# Supplementary material for: NMR Spectroscopy Identifies Chemicals in Cigarette Smoke Condensate That Impair Skeletal Muscle Mitochondrial Function
Source: MDPI journal article supplement (doi:10.3390/toxics10030140), 2022-03-14
Supplement: s1 [file s1]

# Supplementary Materials: NMR Spectroscopy Identifies Chemicals in Cigarette Smoke Condensate That Impair Skeletal Muscle Mitochondrial Function

Ram B. Khattri <sup>1</sup>, Trace Thome <sup>1</sup>, Liam F. Fitzgerald <sup>2</sup>, Stephanie E. Wohlgenuth <sup>3</sup>, Russell T. Hepple <sup>2</sup> and Terence E. Ryan <sup>1,4,\*</sup>

**Table S1.** Peak assignments of chemicals present in cigarette smoke condensate (CSC). Chenomx NMR Suite 8.6, biological magnetic resonance bank (BMRB) and several published literatures [1–4] were used to annotate these chemicals. The concentrations of the majority of these chemicals were determined using Chenomx NMR Suite 8.6 or by using a peak area of either 0.5 mM DSS peak at 0.0 ppm (for water soluble chemicals) or 10 mM pyrazine peak at 8.61 ppm (for chloroform soluble chemicals).

| S.No. | Chemicals                                                                                                             | " $\delta$ " in ppm & multiplicity <sup>a</sup>               | Concentration (mM) | Solvent system |
|-------|-----------------------------------------------------------------------------------------------------------------------|---------------------------------------------------------------|--------------------|----------------|
| 1     | Glycerol [1,2]                                                                                                        | 3.8(m), 3.6(dd), 3.6(dd)                                      | 20.51              | X*             |
| 2     | Quinoline [3]                                                                                                         | 8.5(dd), 7.9(dd), 7.5(q)                                      | 9.22               | Y*             |
| 3     | Octanoic acid and/or nonanoic acid and/or decanoic acid and/or pentadecanoic acid and/or palmitic acid (Mixtures) [2] | 5.08(m); 2.33(t), 1.63(p), 1.30(m), 0.87(t)                   | 9.0                | Z*             |
| 4     | Acetonitrile [2]                                                                                                      | 2.05(s)                                                       | 7.88               | Y*             |
| 5     | Acetone [3]                                                                                                           | 2.3(s)                                                        | 4.68               | Y*             |
| 6     | Ethylene glycol                                                                                                       | 3.6(s)                                                        | 2.12               | X*             |
| 7     | Methanol                                                                                                              | 3.22(s)                                                       | 1.62               | Y*             |
| 8     | Butanone [3]                                                                                                          | 2.6(q), 2.2(s), 1.0(t)                                        | 1.46               | Y*             |
| 9     | Triacetin                                                                                                             | 5.31(m), 4.35(dd), 4.30(dd); other peaks are obscured         | 1.33               | X, Z*          |
| 10    | Pyrogallol                                                                                                            | 6.86(t), 6.76(d)                                              | 1.07               | Z*             |
| 11    | Lactate                                                                                                               | 1.32(d), 4.11(q)                                              | 0.77               | X*             |
| 12    | Phenol [3]                                                                                                            | 7.2(t), 6.9(t), 6.8(d)                                        | 0.73               | Y*             |
| 13    | Proline                                                                                                               | 4.1(q), 3.4(m), 3.3(m); other peaks are obscured              | 0.70               | X*             |
| 14    | Acetamide [2,3]                                                                                                       | 2.0(s)                                                        | 0.69               | Y*             |
| 15    | Myo-Inositol                                                                                                          | 4.1(t), 3.6(t), 3.5(dd), 3.3(t)                               | 0.68               | X*             |
| 16    | Nicotine [2,3]                                                                                                        | 8.66(d), 8.65(d), 8.04(d), 7.59(q); other peaks are obscured  | 0.65               | X*             |
| 17    | 1,2,3,4-tetrahydronaphthalene [2]                                                                                     | 7.15 (m), 2.76(m), 1.83(m)                                    | 0.64               | Z*             |
| 18    | N-Nitrosodimethylamine                                                                                                | 3.8(s), 3.1(s)                                                | 0.59               | X*             |
| 19    | 1,6-Anhydro- $\beta$ -D-glucose                                                                                       | 5.4(t), 4.6(d); other peaks are obscured                      | 0.47               | X*             |
| 20    | Hydroquinone [2,3]                                                                                                    | 6.8(s)                                                        | 0.43               | X*             |
| 21    | Dimethylamine                                                                                                         | 2.74(s)                                                       | 0.42               | X*             |
| 22    | Isopropanol                                                                                                           | 3.8(m), 1.1(d)                                                | 0.4                | Y*             |
| 23    | Catechol [2,3]                                                                                                        | 6.9(q), 6.9 (q)                                               | 0.37               | X*             |
| 24    | $\alpha$ -pinene [2]                                                                                                  | 3.04(d), 2.02(m), 1.90(m), 1.71(s), 1.62(d), 1.33(d), 0.91(s) | 0.34               | Z*             |
| 25    | Succinate                                                                                                             | 2.4(s)                                                        | 0.31               | X*             |
| 26    | Citrate                                                                                                               | 2.7(d), 2.5(d)                                                | 0.30               | X*             |
| 27    | Ascorbate                                                                                                             | 4.5(d); other peaks are obscured                              | 0.28               | X*             |
| 28    | Valerate                                                                                                              | 0.9(t); other peaks are obscured                              | 0.27               | X*             |
| 29    | Butyrate                                                                                                              | 0.9(t); other peaks obscured                                  | 0.22               | Y*             |

|    |                         |                                                                           |       |    |
|----|-------------------------|---------------------------------------------------------------------------|-------|----|
| 30 | Leucine                 | 0.9(t); Other peaks obscured                                              | 0.19  | X* |
| 31 | Cotinine [2]            | 8.52(d), 8.51(d), 8.46(d), 7.79(t), 7.77(t),<br>7.51(q), 2.61(m), 1.96(m) | 0.183 | X* |
| 32 | Dimethyl sulfide        | 3.1(s)                                                                    | 0.17  | X* |
| 33 | Isoleucine              | 1.0(d); other peaks obscured                                              | 0.17  | X* |
| 34 | Propylene glycol [1]    | 3.9(m), 3.5(dd), 3.4(dd), 1.1 (d)                                         | 0.14  | X* |
| 35 | Alanine                 | 1.46(d),3.8(q)                                                            | 0.14  | X* |
| 36 | Acetate                 | 1.91(s)                                                                   | 0.13  | X* |
| 37 | Valine                  | 1.10(d), 1.0(d); other peaks obscured                                     | 0.13  | X* |
| 38 | Isovalerate             | 0.9(d); other peaks obscured                                              | 0.11  | X* |
| 39 | o-cresol [3]            | 7.2(d), 7.1(t), 6.9(d), 6.9(d), 2.2(s)                                    | 0.087 | X* |
| 40 | 2-Furoate               | 7.6(s), 7.0(d), 6.5(q)                                                    | 0.08  | X* |
| 41 | Ethyl benzene [3]       | 1.00(t), 2.8(q), 7.1(s)                                                   | 0.08  | Z* |
| 42 | N-nitrosomorpholine [2] | 4.31(t), 3.90(t), 3.87(t), 3.67(t)                                        | 0.07  | Z* |
| 43 | p-cresol [2,3]          | 7.1(d), 6.8(d), 2.2(s)                                                    | 0.06  | X* |
| 44 | Sucrose                 | 5.4(d); other peaks obscured                                              | 0.06  | X* |
| 45 | Formaldehyde [2,3]      | 9.6(s)                                                                    | 0.06  | Z* |
| 46 | Glucose                 | 5.2(d); other peaks obscured                                              | 0.06  | X* |
| 47 | Tyrosine                | 7.2(d), 6.9(d), 3.9(q), 3.2(q), 3.0(q)                                    | 0.04  | X* |
| 48 | Pyridine [2,3]          | 7.45(t), 7.90(m), 8.45(d)                                                 | 0.04  | X* |
| 49 | Phenylacetate [2]       | 7.4(t), 7.3(t), 3.5(s)                                                    | 0.04  | X* |
| 50 | 4-Hydroxybenzoate       | 6.9(d), 7.8(d)                                                            | 0.03  | X* |
| 51 | Nicotinate              | 8.9(dd), 8.6(dd), 8.2(dt), 7.5(dd)                                        | 0.02  | X* |
| 52 | Formate                 | 8.45(s)                                                                   | 0.02  | Y* |
| 53 | Niacinamide             | 8.9(d); 8.2(dt); other peaks are obscured                                 | 0.02  | X* |
| 54 | Cis-Aconitate           | 5.7(t); 3.1(d)                                                            | 0.01  | X* |
| 55 | Caffeine [2,3]          | 7.9(s); other peaks obscured                                              | 0.01  | X* |
| 56 | 1-Methylnicotinamide    | 9.3(s), 9.0(d), 8.9(d); other peaks obscured                              | 0.007 | X* |
| 57 | Benzaldehyde [4]        | 10.05(s); other peaks are obscured                                        | 0.006 | Z* |
| 58 | Propionaldehyde [3]     | 1.02(t), 2.47(q), 9.74(s)                                                 | 0.005 | Z* |
| 59 | Nonanal [2]             | 9.76(s); other peaks are obscured                                         | 0.003 | Z* |
| 60 | Octanal [2]             | 9.77(s); other peaks are obscured                                         | 0.002 | Z* |

<sup>a</sup>Multiplicity of 1D <sup>1</sup>H resonances: “s”, singlet; “d”, doublet; “t”, triplet; “dd”, doublet of doublet; “q”, quartet; “m”, multiplet. Solvent system: “X\*” represents the NMR sample that was prepared after flash freeze drying of 45 µL of 4% CSC followed by re-suspension in 50 µL of 50 mM phosphate buffer (pH 7.2) along with 0.5 mM of DSS and 0.02% NaN<sub>3</sub> in 100% deuterated condition. “Y\*” consisted of 50 µL of NMR sample prepared by taking 45 µL of 4% CSC combined with 0.5 mM of DSS and 0.02% NaN<sub>3</sub>. A small drift in the chemical shift of some chemicals can be seen because of the acidic pH of this solvent system. “Z\*” solvent system had NMR sample that was prepared by flash freeze drying of 45 µL of 4% CSC followed by resuspension in 70 µL of CDCl<sub>3</sub> with 10 mM of pyrazine as an internal standard. Note: Triacetin was found in both aqueous and organic phases.

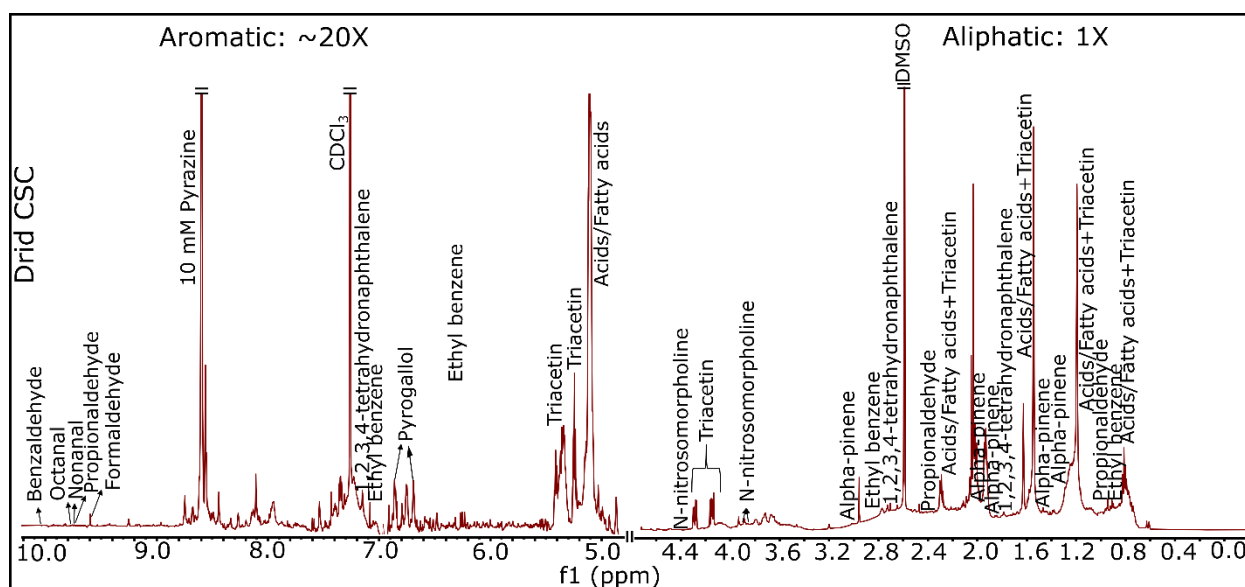

**Figure S1.**  $^1\text{H}$  NMR spectra showing the hydrophobic metabolites (in  $\text{CDCl}_3$  with 10 mM of pyrazine as an internal standard) in 4% cigarette smoke condensate. A total of 12 metabolites were annotated (listed in Supplementary Table S1) using Chenomx NMR Suite 8.6, biological magnetic resonance bank (BMRB), a set of 2D experiments (Supplementary Figures S2–S4), and several published literatures.

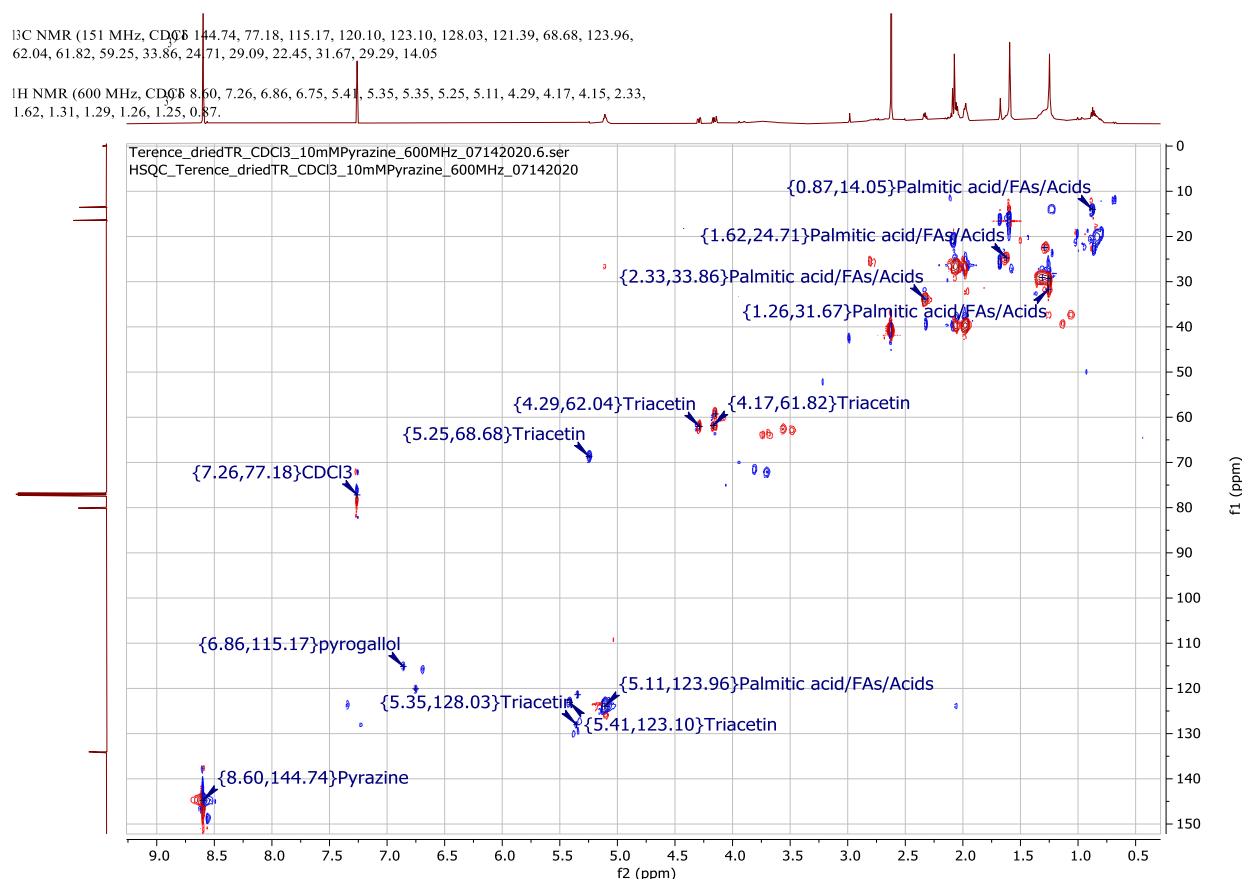

**Figure S2.** A part of heteronuclear single quantum coherence spectroscopy (HSQC) showing hydrophobic metabolites acquired with a CP TXI CryoProbe with an Avance II Console (14.1 T, Bruker Biospin, Billerica, MA) NMR instrument.

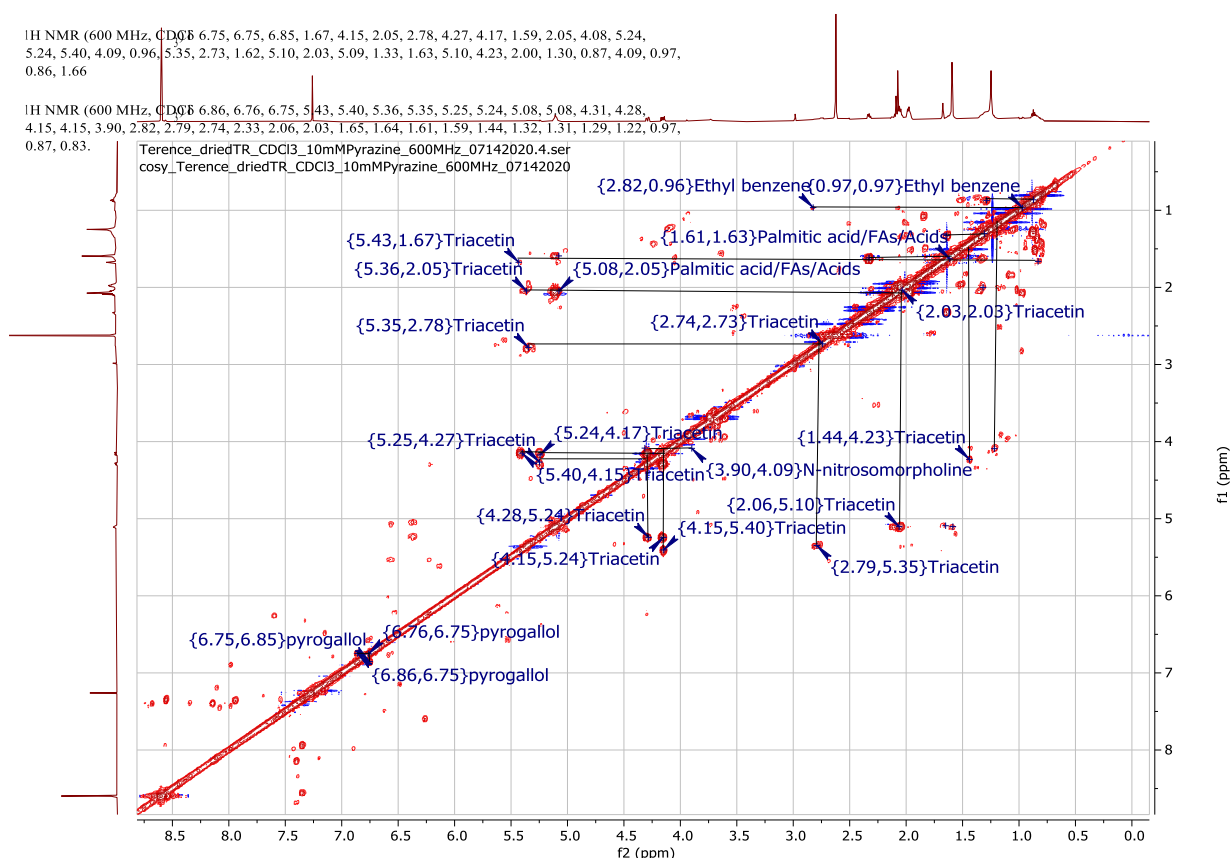

**Figure S3.** A part of homonuclear correlation spectroscopy (COSY) showing hydrophobic metabolites acquired with a CP TXI CryoProbe with an Avance II Console (14.1 T, Bruker Biospin, Billerica, MA) NMR instrument.

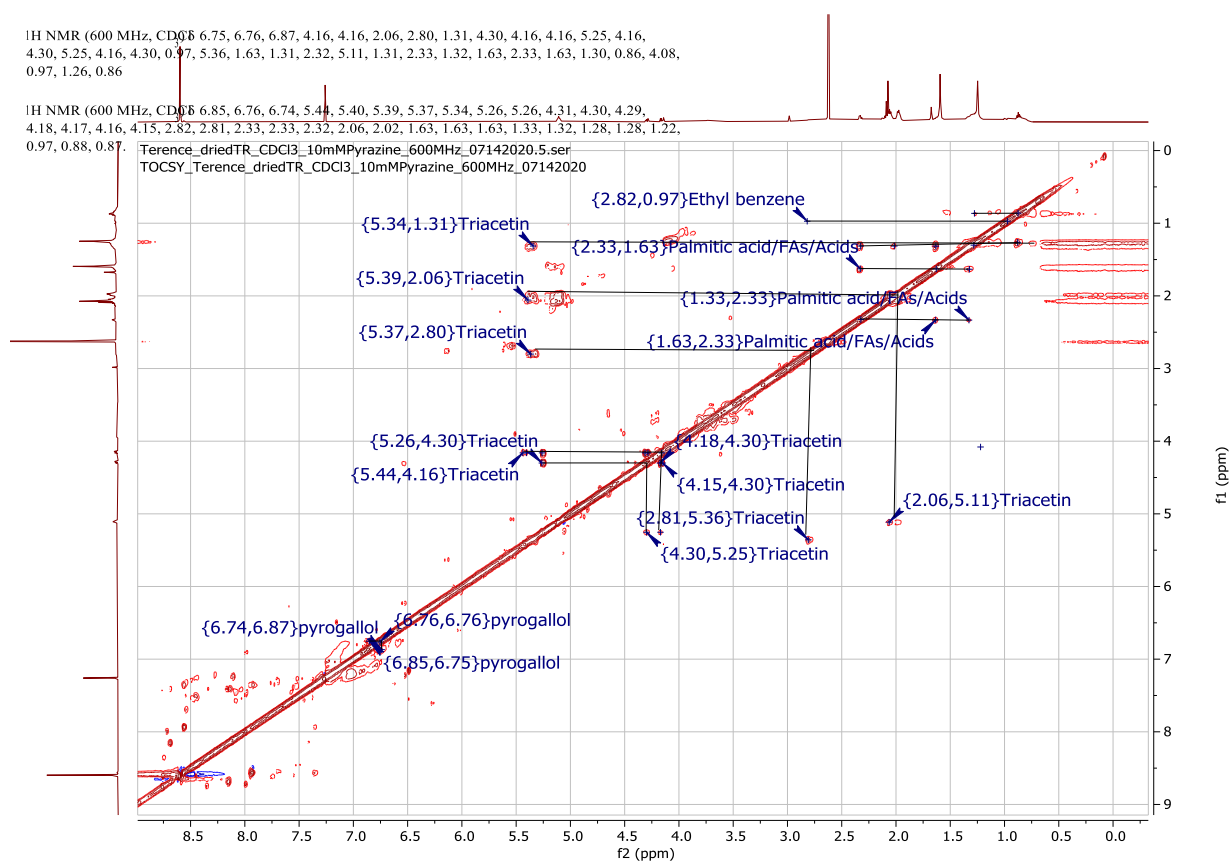

**Figure S4.** A part of total correlation spectroscopy (TOCSY) showing hydrophobic metabolites acquired with a CP TXI CryoProbe with an Avance II Console (14.1 T, Bruker Biospin, Billerica, MA) NMR instrument.

## References

1. Jensen, R.P.; Strongin, R.M.; Peyton, D.H. Solvent Chemistry in the Electronic Cigarette Reaction Vessel. *Sci. Rep.* **2017**, *7*, 42549. <https://doi.org/10.1038/srep42549>
2. Ulrich, E.L.; Akutsu, H.; Doreleijers, J.F.; Harano, Y.; Ioannidis, Y.E.; Lin, J.; Livny, M.; Mading, S.; Maziuk, D.; Miller, Z.; et al. BioMagResBank. *Nucleic Acids Res.* **2008**, *36*, D402–D408. <https://doi.org/10.1093/nar/gkm957>.
3. Ticha, J.; Wright, C. Rapid detection of toxic compounds in tobacco smoke condensates using high-resolution H-1-nuclear magnetic resonance spectroscopy. *Anal. Methods* **2016**, *8*, 6388–6397. <https://doi.org/10.1039/c6ay00849f>.
4. Remaud, G.; Debon, A.; Martin, Y.; Martin, G.; Martin, G. Authentication of bitter almond oil and cinnamon oil: Application of the SNIF-NMR method to benzaldehyde. *J. Agric. Food Chem.* **1997**, *45*, 4042–4048. <https://doi.org/10.1021/jf970143d>
